# Supplementary material for: Internet Gaming Disorder: Investigating the Clinical Relevance of a New Phenomenon
Source: Atypon-hosted journal article supplement (doi:10.1176/appi.ajp.2016.16020224), 2016-11-04
Supplement: appi.ajp.2016.16020224.ds001.pdf [file appi.ajp.2016.16020224.ds001.pdf]

 


Psychiatry Online
